# Supplementary material for: Effects of repetitive transcranial magnetic stimulation on upper-limb and finger function in stroke patients: A systematic review and meta-analysis of randomized controlled trials
Source: PubMed Central journal article supplement (PMC9372362; doi:10.3389/fneur.2022.940467), 2022-07-29
Supplement: Data_Sheet_1.pdf [file Data_Sheet_1.pdf]

**Supplementary Table 1** Search engine and query

---

| Search engine  | Search query                                                                                                                                                                                                                                                                                                                                                                                                                                                                                                                                                                                                                                                                                                                             | Date of search |
|----------------|------------------------------------------------------------------------------------------------------------------------------------------------------------------------------------------------------------------------------------------------------------------------------------------------------------------------------------------------------------------------------------------------------------------------------------------------------------------------------------------------------------------------------------------------------------------------------------------------------------------------------------------------------------------------------------------------------------------------------------------|----------------|
| Pubmed         | (((stroke[MeSH Terms]) OR (stroke) OR (cerebrovascular accident)) AND ((transcranial magnetic stimulation[MeSH Terms]) OR (transcranial magnetic stimulation) OR (TMS) OR (repetitive transcranial magnetic stimulation) OR (rTMS) OR (theta burst stimulation) OR (TBS))) AND ((Manual dexterity) OR (motor movement) OR (hand dexterity) OR (motor skills) OR (Upper limb) OR (upper extremity[MeSH Terms]) OR (upper extremity) OR (hand[MeSH Terms]) OR (hand) OR (hands))) AND ((randomized controlled trial[Publication Type]) OR (controlled clinical trial[Publication Type]) OR (randomized[Title/Abstract]) OR (placebo[Title/Abstract]) OR (randomly[Title/Abstract]) OR (trial[Title/Abstract]) OR (groups[Title/Abstract])) | 12-Feb-22      |
| Embase         | (stroke OR (cerebrovascular AND accident)) AND (tms OR (transcranial AND magnetic AND stimulation) OR (repetitive AND transcranial AND magnetic AND stimulation) OR rtms OR (theta AND burst AND stimulation) OR tbs) AND (hand OR (manual AND dexterity) OR (motor AND movement) OR (hand AND dexterity) OR (motor AND skills) OR (upper AND limb) OR (upper AND extremity) OR hands) AND ('randomized controlled trial':it OR 'controlled clinical trial':it OR randomized:ab,ti OR placebo:ab,ti OR randomly:ab,ti OR trial:ab,ti OR groups:ab,ti)                                                                                                                                                                                    | 12-Feb-22      |
| Web of science | (((TS=(stroke OR cerebrovascular accident)) AND TS=(transcranial magnetic stimulation OR TMS OR repetitive transcranial magnetic stimulation OR rTMS OR theta burst stimulation OR TBS)) AND TS=(Manual dexterity OR motor movement OR hand dexterity OR motor skills OR Upper limb OR upper extremity OR hand OR hands)) AND TS=(randomized controlled trial OR controlled clinical trial OR randomized OR placebo OR randomly OR trial OR groups)                                                                                                                                                                                                                                                                                      | 12-Feb-22      |

---

**Supplementary Table 2** Characteristics of the included studies

| References                   | No. of participants (Exp/Ctr) | Mean age (years) (Exp/Ctr) | Mean time Post-stroke Stage | Baseline FMA-UE score Subgroup | rTMS protocol                                  | Sessions    | Stimulated site                       | Outcome measurement | Measure time                                        |
|------------------------------|-------------------------------|----------------------------|-----------------------------|--------------------------------|------------------------------------------------|-------------|---------------------------------------|---------------------|-----------------------------------------------------|
| Askin et al(2017) [36]       | 40(20/20)                     | 56.75/58.8                 | III                         | 22.75<br>Severe                | 1Hz ,90%RMT,1200pulses                         | 10 sessions | Unaffected side                       | FMA-UE BBT          | Post-intervention                                   |
| Barros et al(2014) [60]      | 20(10/10)                     | 57.4/64.6                  | III                         | 23.55<br>Severe                | 1Hz ,90%MT,1500pulses                          | 10 sessions | Unaffected side                       | FMA-UE              | Post-intervention, Follow-up,4w                     |
| Bonin et al(2019) [61]       | 19(9/10)                      | 57.22/50.5                 | III                         | 26.3<br>Severe                 | 1Hz,100%RMT,1200pulses                         | 18 sessions | Unaffected side                       | FMA-UE              | After 10 sessions intervention<br>Post-intervention |
| Cha et al (2016) [37]        | 25(15/10)                     | 64.07/63.33                | II                          |                                | 1Hz,90%MT,1200pulses                           | 20 sessions | Right hemisphere, P3 10/20 EEG system | BBT                 | Post-intervention                                   |
| Chang et al (2010) [38]      | 28(18/10)                     | 56.4/57.0                  | I                           | 20.19<br>Severe                | 10Hz,90%RMT,1000pulses                         | 10 sessions | Affected side                         | FMA-UE BBT          | Post-intervention, Follow-up,2m                     |
| Chen et al(2021)a [32]       | 50(25/25)                     | 58/65                      | I                           | 17.74<br>Severe                | 10Hz,90%RMT,600pulses +1Hz, 90%RMT, 600pulses  | 20 sessions | Bilateral                             | FMA-UE              | Post-intervention, Follow-up,3 m                    |
| Chen et al(2021)b [32]       | 50(25/25)                     | 62/65                      | I                           | 19.86<br>Severe                | 10Hz,90%RMT,600pulses                          | 20 sessions | Affected side                         | FMA-UE              | Post-intervention, Follow-up,3 m                    |
| Chen et al(2021)c [32]       | 50(25/25)                     | 63/65                      | I                           | 18.71<br>Severe                | 1Hz,90%RMT,600pulses                           | 20 sessions | Unaffected side                       | FMA-UE              | Post-intervention, Follow-up,3 m                    |
| Chen et al(2021) [39]        | 23(12/11)                     | 53.36/48.95                | III                         | 39.26<br>Moderate              | iTBS,80% AMT,1200pulses                        | 15 sessions | Affected side                         | FMA-UE BBT<br>NHPT  | Post-intervention                                   |
| Chen et al(2019) [41]        | 22(11/11)                     | 52.9/52.6                  | III                         | 31.68<br>Moderate              | iTBS, 80% AMT,600pulses                        | 10 sessions | Affected side                         | FMA-UE BBT          | Post-intervention                                   |
| Chervyakov et al(2018)a [33] | 18(8/10)                      | 60.7/61.4                  | III                         | 31.1<br>Moderate               | 10Hz,80%RMT,200pulses +1Hz ,100%RMT,1200pulses | 10 sessions | Bilateral                             | FMA-UE              | Post-intervention                                   |
| Chervyakov et al(2018)b [33] | 23(13/10)                     | 58.6/61.4                  | III                         | 32.87<br>Moderate              | 10Hz,80%RMT,200pulses                          | 10 sessions | Affected side                         | FMA-UE              | Post-intervention                                   |
| Chervyakov et al(2018)c [33] | 21(11/10)                     | 54.2/61.4                  | III                         | 31.22<br>Moderate              | 1Hz,100%RMT,1200pulses                         | 10 sessions | Unaffected side                       | FMA-UE              | Post-intervention                                   |
| Di Lazzaro et al (2016) [64] | 17(8/9)                       | 57.88/56.78                | III                         | 13.47<br>Severe                | cTBS,80% AMT,600pulses                         | 10 sessions | Affected side                         | FMA-UE              | Post-intervention, Follow-up,1m,3m                  |
| Di Lazzaro et al (2013) [40] | 12(6/6)                       | 59.5/57.5                  | III                         |                                | cTBS,80% AMT,600pulses                         | 10 sessions | Affected side                         | NHPT                | Post-intervention, Follow-up 1m,3m                  |
| Du et al(2016)a [20]         | 46(23/23)                     | 56.78/53.61                | I                           | 24.22<br>Severe                | 3Hz,80%-90%RMT,1200pulses                      | 5 sessions  | Affected side                         | FMA-UE              | Post-intervention, Follow-up,1m,2m, 3m              |
| Du et al(2016)b [20]         | 46(23/23)                     | 56.78/53.61                | I                           | 24.28<br>Severe                | 1Hz,110%-120%RMT,1200pulses                    | 5 sessions  | Unaffected side                       | FMA-UE              | Post-intervention, Follow-up,1m,2m, 3m              |
| Du et al(2022)a [21]         | 120(60/60)                    | 58.22/58.77                | III                         | 23.81<br>Severe                | 1Hz,90%RMT,20min                               | 20 sessions | Unaffected side                       | FMA-UE              | Post-intervention                                   |
| Du et al(2022)b [21]         | 120(60/60)                    | 59.05/57.2                 | III                         | 23.85<br>Severe                | 1Hz,90%RMT,20min                               | 20 sessions | Unaffected side                       | FMA-UE              | Post-intervention                                   |

**Supplementary Table 2** Characteristics of the included studies

| References              | No. of participants (Exp/Ctr) | Mean age (years) (Exp/Ctr) | Mean time Post-stroke Stage | Baseline FMA-UE score Subgroup | rTMS protocol                                  | Sessions    | Stimulated site | Outcome measurement | Measure time                                                    |
|-------------------------|-------------------------------|----------------------------|-----------------------------|--------------------------------|------------------------------------------------|-------------|-----------------|---------------------|-----------------------------------------------------------------|
| Du et al(2019)a [22]    | 40(20/20)                     | 54/56                      | I                           | 27.5<br>Severe                 | 10Hz,100%RMT,1200pulses                        | 5 sessions  | Affected side   | FMA-UE              | Post-intervention, Follow-up 3m                                 |
| Du et al(2019)b [22]    | 40(20/20)                     | 56/56                      | I                           | 28<br>Severe                   | 1Hz,100%RMT,1200pulses                         | 5 sessions  | Unaffected side | FMA-UE              | Post-intervention, Follow-up 3m                                 |
| Fregni et al(2006) [42] | 15(10/5)                      | 57.7/52.6                  | III                         |                                | 1Hz,100%MT,1200pulses                          | 5 sessions  | Unaffected side | PPT                 | Post-intervention, Follow-up,15d                                |
| Guan et al(2017) [51]   | 42(21/21)                     | 59.7/57.4                  | I                           | 39.15<br>Moderate              | 5Hz,120%MT,1000pulses                          | 10 sessions | Unaffected side | FMA-UE              | Post-intervention Follow-up, 15d,3m,6m,1Y                       |
| Harvey et al(2018) [62] | 199(132/67)                   | 59.2/57.6                  | III                         | 34.34<br>Moderate              | 1Hz ,15min                                     | 18 sessions | Unaffected side | FMA-UE              | Post-intervention, Follow-up,1m,3m,6m                           |
| Hosomi et al(2016) [54] | 39(18/21)                     | 62.4/63.2                  | II                          | 36.50<br>Moderate              | 5Hz,90%RMT,500pulses                           | 10 sessions | Affected side   | FMA-UE              | After 5 sessions intervention, Post-intervention, Follow-up 17d |
| Hsu et al(2013) [52]    | 12(6/6)                       | 56.8/62.3                  | I                           | 36.4<br>Moderate               | iTBS,80% AMT,1200pulses                        | 10 sessions | Affected side   | FMA-UE              | Post-intervention, Follow-up,1m                                 |
| Jil et al(2014) [43]    | 23(12/11)                     | 54.73/50.53                | III                         |                                | 10Hz,15min                                     | 30 sessions | Affected side   | BBT                 | Post-intervention                                               |
| Juan et al(2022)a [23]  | 29(15/14)                     | 51/52                      | I                           | 29.14<br>Moderate              | 10Hz,100%RMT,1200pulses                        | 5 sessions  | Affected side   | FMA-UE              | Post-intervention, Follow-up,3m                                 |
| Juan et al(2022)b [23]  | 31(17/14)                     | 56/52                      | I                           | 27.19<br>Severe                | 1Hz,100%RMT,1200pulses                         | 5 sessions  | Unaffected side | FMA-UE              | Post-intervention, Follow-up,3m                                 |
| Khan et al(2019) [50]   | 40(20/20)                     | 63.55/64.60                | I                           | 14.6<br>Severe                 | iTBS,60% RMT,600pulses +cTBS,60% RMT,600pulses | 12 sessions | Bilateral       | FMA-UE              | Post-intervention, Follow-up, 2m,5m,11m                         |
| Khedr et al(2009)a [24] | 24(12/12)                     | 59.0/60                    | I                           |                                | 3Hz,130% RMT,900pulses                         | 5 sessions  | Affected side   | PPT                 | Post-intervention, Follow-up, 1m,2m,3m                          |
| Khedr et al(2009)b [24] | 24(12/12)                     | 54.7/60                    | I                           |                                | 1Hz,100% RMT,900pulses                         | 5 sessions  | Unaffected side | PPT                 | Post-intervention, Follow-up, 1m,2m,3m                          |
| Kim et al(2020)a [25]   | 40(20/20)                     | 62.7/64.0                  | II                          | 10.5<br>Severe                 | 20Hz,90% RMT,1500pulses                        | 10 sessions | Affected side   | FMA-UE              | Post-intervention                                               |
| Kim et al(2020)b [25]   | 38(18/20)                     | 61.8/64.0                  | II                          | 10.2<br>Severe                 | 1Hz,90% RMT,1500pulses                         | 10 sessions | Unaffected side | FMA-UE              | Post-intervention                                               |
| Kuzu et al(2021)a [26]  | 13(7/6)                       | 56.3/65                    | III                         | 16.78<br>Severe                | 1Hz,90% RMT,1200pulses                         | 10 sessions | Unaffected side | FMA-UE              | Post-intervention, Follow-up, 1m                                |
| Kuzu et al(2021)b [26]  | 13(7/6)                       | 61.3/65                    | III                         | 19.31<br>Severe                | cTBS,80% AMT,600pulses                         | 10 sessions | Unaffected side | FMA-UE              | Post-intervention, Follow-up, 1m                                |
| Li et al(2016)a [27]    | 85(43/42)                     | 54.00/53.13                | II                          | 29.00<br>Moderate              | 10Hz,80% MT,1350pulses                         | 10 sessions | Affected side   | FMA-UE              | Post-intervention                                               |

**Supplementary Table 2** Continued

| References                | No. of participants (Exp/Ctr) | Mean age (years) (Exp/Ctr) | Mean time Post-stroke Stage | Baseline FMA-UE score Subgroup | rTMS protocol                                         | Sessions    | Stimulated site | Outcome measurement | Measure time                                           |
|---------------------------|-------------------------------|----------------------------|-----------------------------|--------------------------------|-------------------------------------------------------|-------------|-----------------|---------------------|--------------------------------------------------------|
| Li et al(2016)b [27]      | 84(42/42)                     | 57.87/53.13                | II                          | 28.58<br>Severe                | 1Hz,80%MT,1000pulses                                  | 10 sessions | Unaffected side | FMA-UE              | Post-intervention                                      |
| Long et al (2018)a [28]   | 41(21/20)                     | 55.9/56.85                 | III                         | 34.92<br>Moderate              | 1Hz,90%RMT,1000pulses<br>+10Hz,90%RMT,1000pulses      | 15 sessions | Bilateral       | FMA-UE              | Post-intervention,<br>Follow-up, 3m                    |
| Long et al (2018)b [28]   | 41(21/20)                     | 57/56.85                   | III                         | 35.07<br>Moderate              | 1Hz,90%RMT,1000pulses                                 | 15 sessions | Unaffected side | FMA-UE              | Post-intervention,<br>Follow-up, 3m                    |
| Luk et al(2022) [44]      | 24(12/12)                     | 67.3/65.1                  | II                          | 47.75<br>Mild                  | 1Hz,90%RMT,1200pulses                                 | 10 sessions | Unaffected side | FMA-UE<br>BBT NHPT  | Post-intervention,<br>Follow-up, 10w                   |
| Malcolm(2007) [45]        | 19(9/10)                      | 68.4/65.7                  | III                         |                                | 20Hz,90%MT,2000pulses                                 | 10 sessions | Affected side   | BBT                 | Post-intervention,<br>Follow-up 6m                     |
| Matsuura et al(2015) [46] | 20(10/10)                     | 72.2/74.7                  | I                           | 50.4<br>Mild                   | 1Hz,100%MT,1200pulses                                 | 5 sessions  | Unaffected side | FMA-UE PPT          | Post-intervention                                      |
| Meng et al(2020)a [29]    | 18(10/8)                      | 55.3/53.87                 | II                          | 20.17<br>Severe                | 1Hz,100%RMT,1200pulses<br>+iTBS,60%-80%RMT,1200pulses | 10 sessions | Bilateral       | FMA-UE              | Post-intervention                                      |
| Meng et al(2020)b [29]    | 18(10/8)                      | 52.5/53.87                 | II                          | 21.63<br>Severe                | 1Hz,100%RMT,1200pulses                                | 10 sessions | Unaffected side | FMA-UE              | Post-intervention                                      |
| Haghighi et al(2021) [47] | 20(10/10)                     | 50.50/53.9                 | II                          | 33.6<br>Moderate               | 20Hz,90%RMT,2000pulses                                | 10 sessions | Affected side   | FMA-UE BBT          | Post-intervention                                      |
| Qin et al(2021) [57]      | 41(23/18)                     | 58.52/62.27                | II                          | 27.37<br>Severe                | 1Hz,90%MT,1200pulses                                  | 40 sessions | Unaffected side | FMA-UE              | Post-intervention                                      |
| Rose et al(2014) [63]     | 19(9/10)                      | 64.7/64.6                  | III                         | 39.18<br>Moderate              | 1Hz,100%RMT,1200pulses                                | 16 sessions | Unaffected side | FMA-UE              | Post-intervention                                      |
| Sharma et al(2020) [59]   | 96(47/49)                     | 54.85/52.89                | II                          | 45.25<br>Mild                  | 1Hz,110%RMT,750pulses                                 | 10 sessions | Unaffected side | FMA-UE              | Post-intervention                                      |
| Sung et al(2013)a [34]    | 29(15/14)                     | 62.3/63.1                  | III                         | 27.66<br>Severe                | 1Hz,90%RMT,600pulses<br>+iTBS,80%AMT,600pulses        | 20 sessions | Bilateral       | FMA-UE              | After 10 sessions<br>intervention<br>Post-intervention |
| Sung et al(2013)b [34]    | 26(12/14)                     | 64.2/63.1                  | III                         | 27.81<br>Severe                | iTBS,80%AMT,600pulses                                 | 20 sessions | Affected side   | FMA-UE              | After 10 sessions<br>intervention<br>Post-intervention |
| Sung et al(2013)c [34]    | 27(13/14)                     | 63.3/63.1                  | III                         | 29.95<br>Moderate              | 1Hz,90%RMT,600pulses                                  | 20 sessions | Unaffected side | FMA-UE              | After 10 sessions<br>intervention<br>Post-intervention |
| Wang et al(2014)a [35]    | 33(17/16)                     | 62.2/62.5                  | II                          | 26.2<br>Severe                 | 1Hz,90%RMT,600pulses                                  | 10 sessions | Unaffected side | FMA-UE              | Post-intervention                                      |
| Wang et al(2014)b [35]    | 31(15/16)                     | 63.1/62.5                  | II                          | 27.26<br>Severe                | iTBS,80%MT,600pulses                                  | 10 sessions | Affected side   | FMA-UE              | Post-intervention                                      |

**Supplementary Table 2 Continued**

| References                  | No. of participants (Exp/Ctr) | Mean age (years) (Exp/Ctr) | Mean time Post-stroke Stage | Baseline FMA-UE score Subgroup | rTMS protocol                                                               | Sessions    | Stimulated site | Outcome measurement | Measure time                       |
|-----------------------------|-------------------------------|----------------------------|-----------------------------|--------------------------------|-----------------------------------------------------------------------------|-------------|-----------------|---------------------|------------------------------------|
| Wang et al(2014)c [35]      | 33(17/16)                     | 62.2/62.5                  | II                          | 26.2<br>Severe                 | 1Hz,90%RMT,600pulses,<br>10session; iTBS,80%MT,<br>600pulses ,10sessions    | 20 sessions | Bilateral       | FMA-UE              | Post-intervention<br>Follow-up, 3m |
| Wang et al(2014)d [35]      | 31(15/16)                     | 63.1/62.5                  | II                          | 27.26<br>Severe                | iTBS,80%MT,600pulses,<br>10 sessions; 1hz,90%RMT,<br>600pulses ,10 sessions | 20 sessions | Bilateral       | FMA-UE              | Post-intervention<br>Follow-up, 3m |
| Yang et al(2021) [55]       | 25(12/13)                     | 64/64                      | II                          | 47<br>Mild                     | 5Hz,100%RMT,750pulses                                                       | 10 sessions | Affected side   | FMA-UE              | Post-intervention                  |
| Seniów et al(2012) [58]     | 40(20/20)                     | 63.5/63.4                  | II                          | 38.2<br>Moderate               | 1Hz,90%RMT,1800pulses                                                       | 15 sessions | Unaffected side | FMA-UE              | Post-intervention<br>Follow-up, 3m |
| Gottlieb et al(2021) [56]   | 28(14/14)                     | 63.93/62.43                | II                          | 25.68<br>Severe                | 1Hz,100%RMT,1200pulses                                                      | 10 sessions | Unaffected side | FMA-UE              | Post-intervention                  |
| Higgins et al(2013) [48]    | 9(4/5)                        | 74/60                      | III                         |                                | 1Hz,110%MT,1200pulses                                                       | 8 sessions  | Unaffected side | BBT                 | Post-intervention                  |
| Kim et al(2020)a [30]       | 20(8/12)                      | 67.00/62.17                | I                           | 39.90<br>Moderate              | 1Hz,80%MT,1200pulses                                                        | 15 sessions | Unaffected side | FMA-UE NHPT         | Post-intervention<br>Follow-up, 1m |
| Kim et al(2020)b [30]       | 22(11/11)                     | 67.55/64.45                | I                           | 34.41<br>Moderate              | 1Hz,80%MT,1200pulses                                                        | 15 sessions | Unaffected side | FMA-UE NHPT         | Post-intervention<br>Follow-up, 1m |
| Watanabe et al (2018)a [31] | 13(7/6)                       | 67.6/75.2                  | I                           | 11.80<br>Severe                | 1Hz,110%RMT,1200pulses                                                      | 10 sessions | Unaffected side | FMA-UE              | Follow-up, 10w                     |
| Watanabe et al (2018)b [31] | 14(8/6)                       | 72.5/75.2                  | I                           | 14.36<br>Severe                | iTBS,80%RMT,600pulses                                                       | 10 sessions | Affected side   | FMA-UE              | Follow-up, 10w                     |
| Özkeskin et al(2016) [65]   | 21(10/11)                     | 55.7/65.54                 | III                         | 39.52<br>Moderate              | 1Hz,90%RMT,1500pulses                                                       | 10 sessions | Unaffected side | FMA-UE              | Follow-up, 10d,1m,3m               |
| Kim et al(2020) [49]        | 73(36/37)                     | 61.2/62.9                  | I                           | 40.69<br>Moderate              | 1Hz,100%RMT,1800pulses                                                      | 10 sessions | Unaffected site | FMA-UE BBT          | Post-intervention<br>Follow-up, 1m |

I , acute stroke; II ,subacute stroke; III ,chronic stroke; RMT, resting motor threshold; AMT, active motor threshold; Hz, hertz; m, months; w,weeks; d, days; y, years; Exp, experimental group; Ctr, control group; FMA-UE, Fugl-Meyer Assessment Upper Extremity Scale; BBT, Box and Block Test; NHPT, Nine Hole Peg Test; PPT, Purdue Pegboard Test.

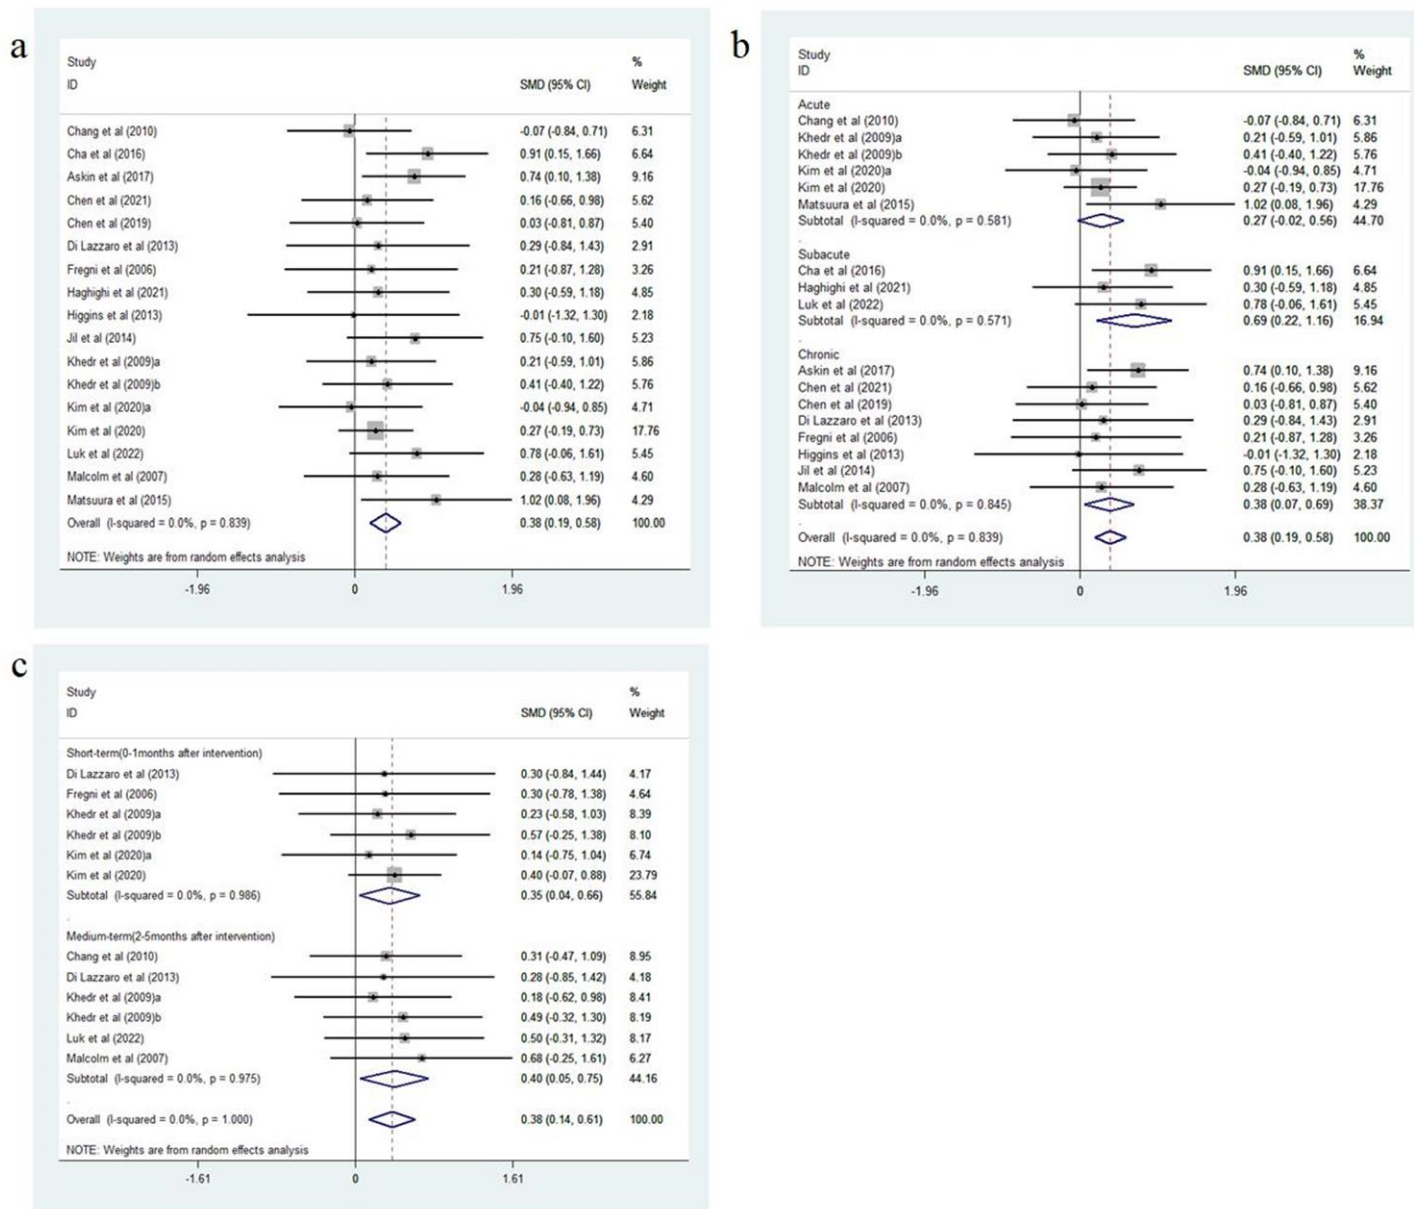

**Supplementary Fig.1** a. Forest plot of hand function recovery in stroke patients compared with controls; b. Forest plot of hand function recovery in stroke patients disaggregated by phase of stroke compared with controls; c. Forest plot of hand function recovery in stroke patients disaggregated by measurement time compared with controls.

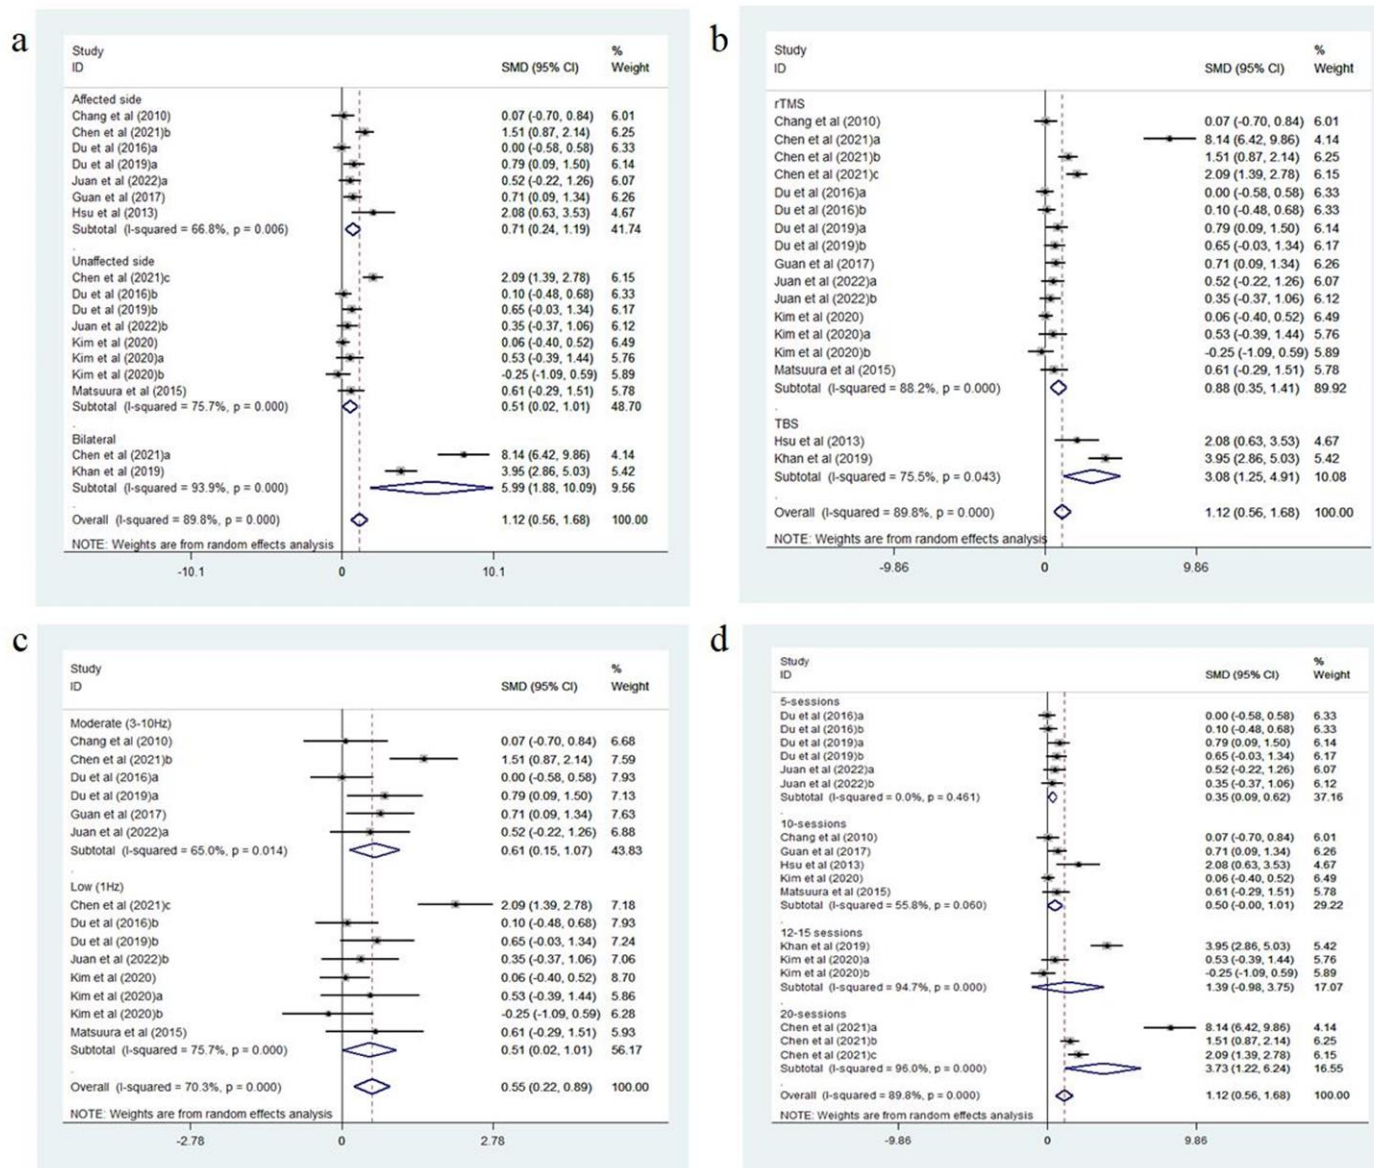

**Supplementary Fig.2** a. Forest plot of FMA-UE compared with controls by stimulation site in patients with acute phase stroke; b. Forest plot of FMA-UE in patients with acute phase stroke disaggregated by stimulation method compared with controls; c. Forest plot of FMA-UE in patients with acute phase stroke disaggregated by by rTMS frequency compared with controls; d. Forest plot of FMA-UE in patients with acute phase stroke disaggregated by by number of treatment sessions compared with controls.

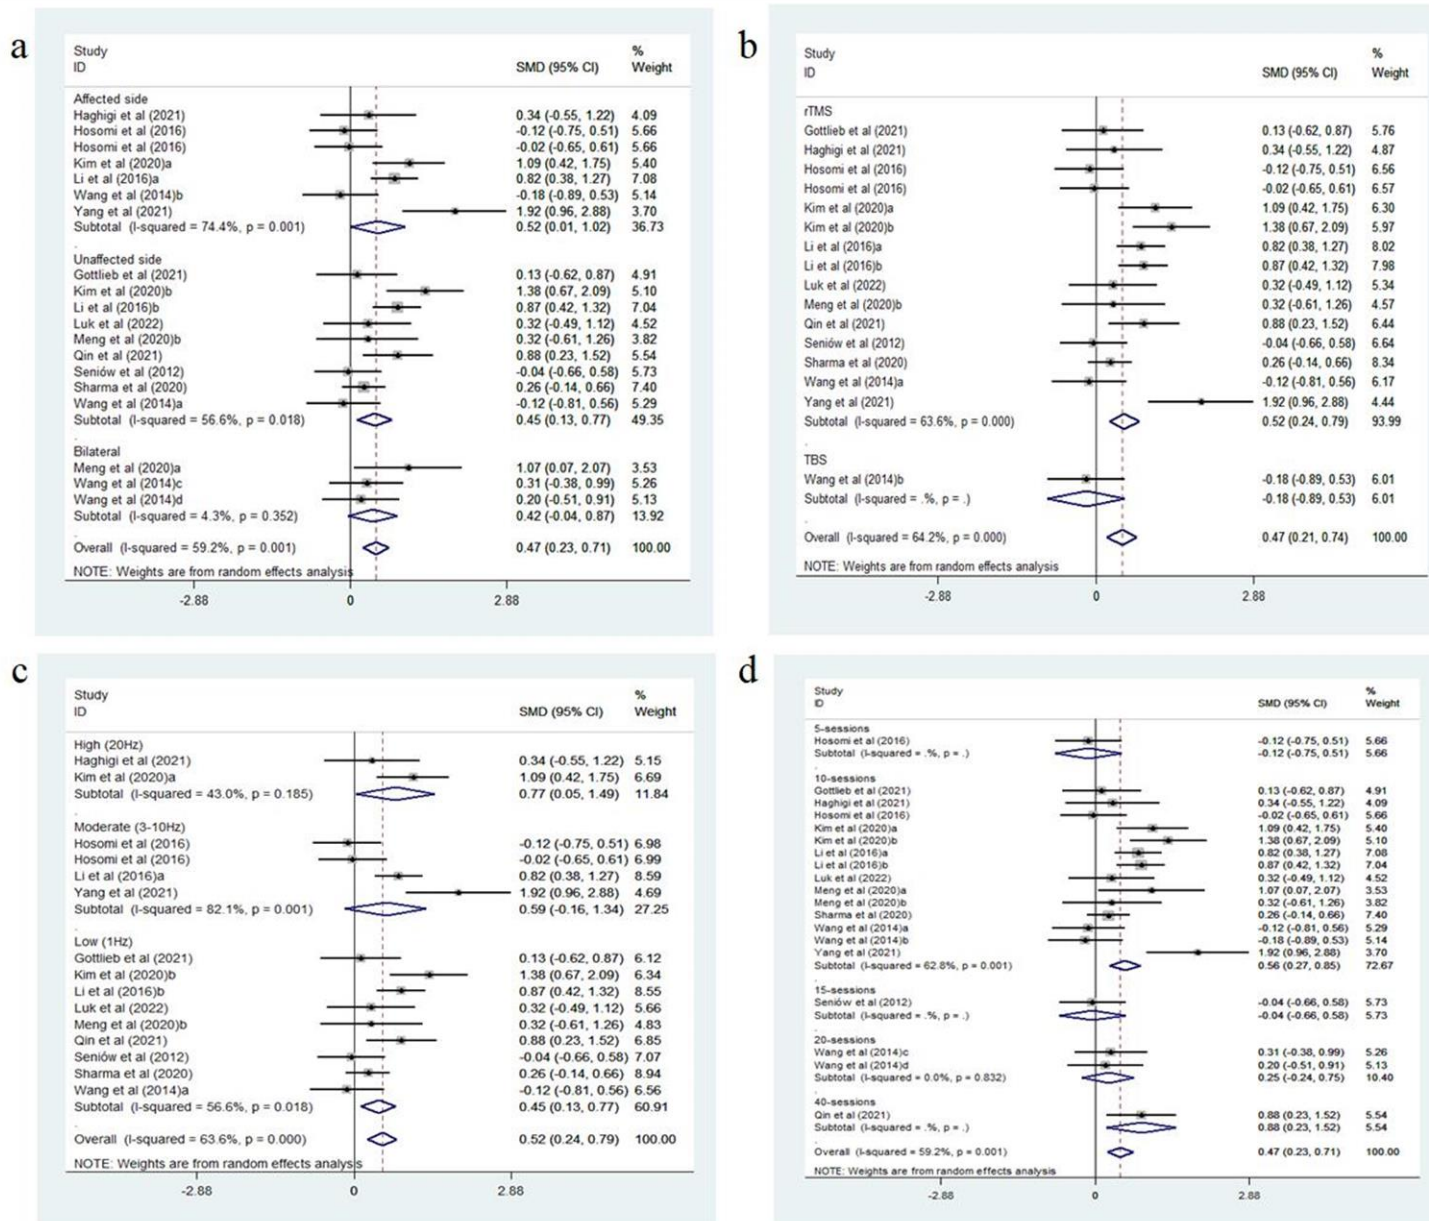

**Supplementary Fig.3** a. Forest plot of FMA-UE in patients with subacute phase stroke disaggregated by stimulation site compared with controls; b. Forest plot of FMA-UE in patients with subacute phase stroke disaggregated by stimulation method compared with controls; c. Forest plot of FMA-UE in patients with subacute phase stroke disaggregated by by rTMS frequency compared with controls; d. Forest plot of FMA-UE in patients with subacute phase stroke disaggregated by by number of treatment sessions compared with controls.



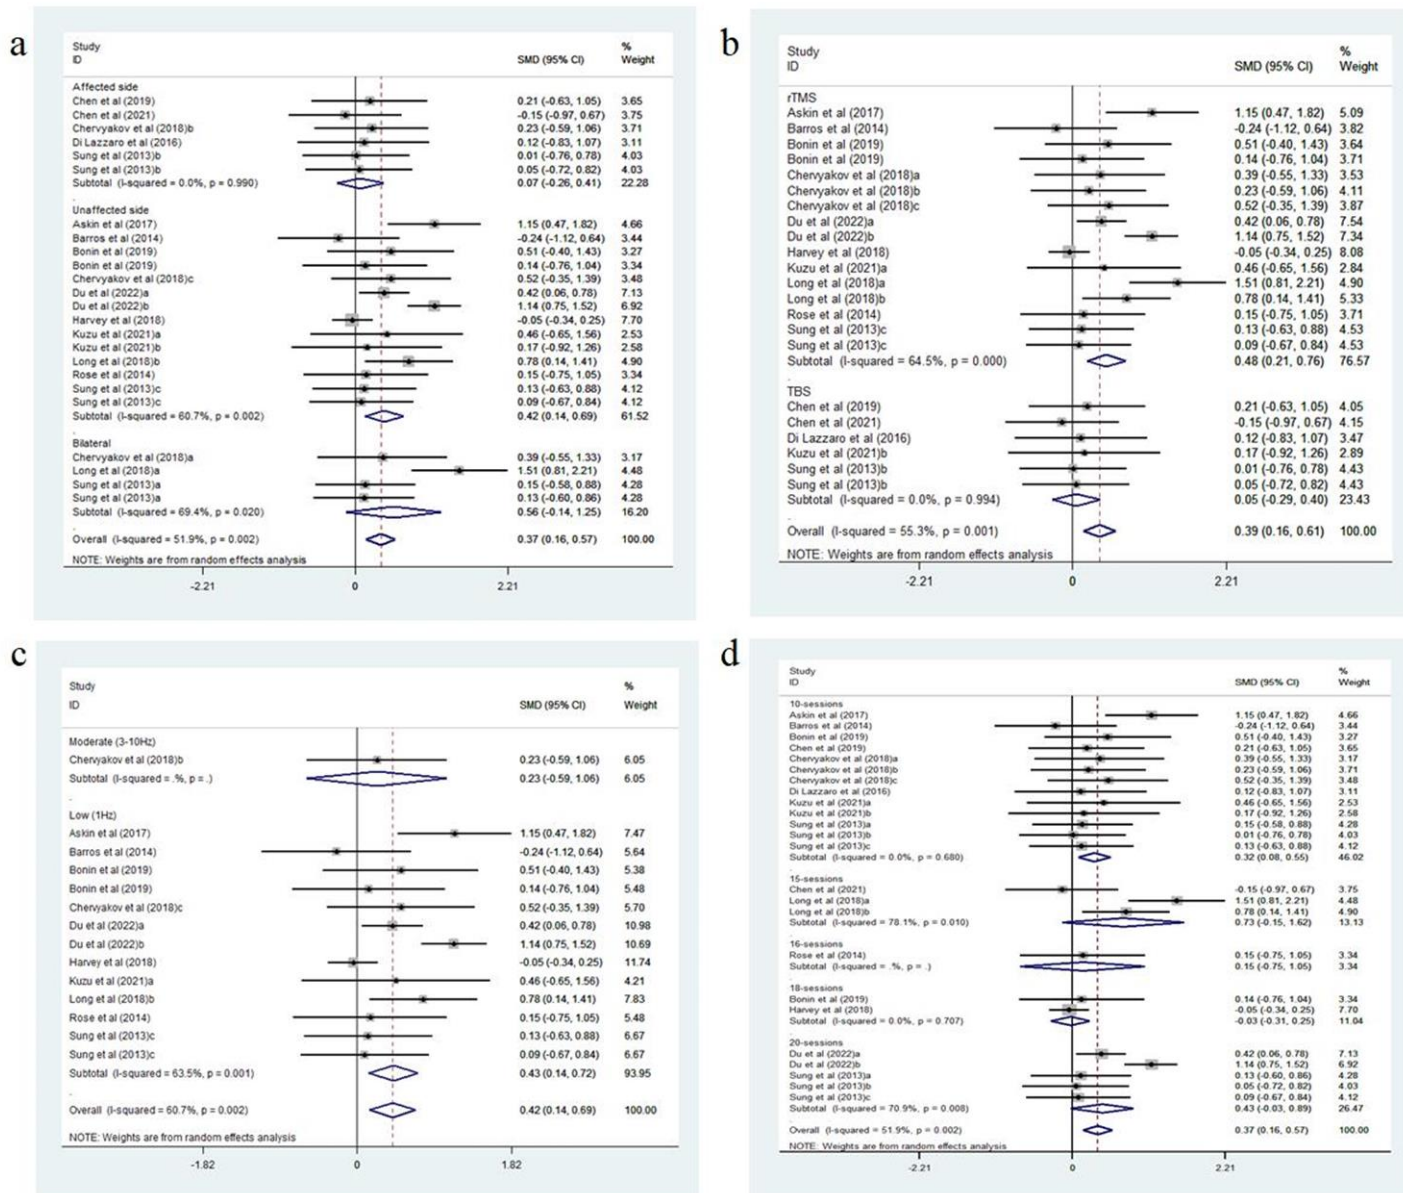

**Supplementary Fig.4** a. Forest plot of FMA-UE in patients with chronic phase stroke disaggregated by stimulation site compared with controls; b. Forest plot of FMA-UE in patients with chronic phase stroke disaggregated by stimulation method compared with controls; c. Forest plot of FMA-UE in patients with chronic phase stroke disaggregated by by rTMS frequency compared with controls; d. Forest plot of FMA-UE in patients with chronic phase stroke disaggregated by by number of treatment sessions compared with controls.

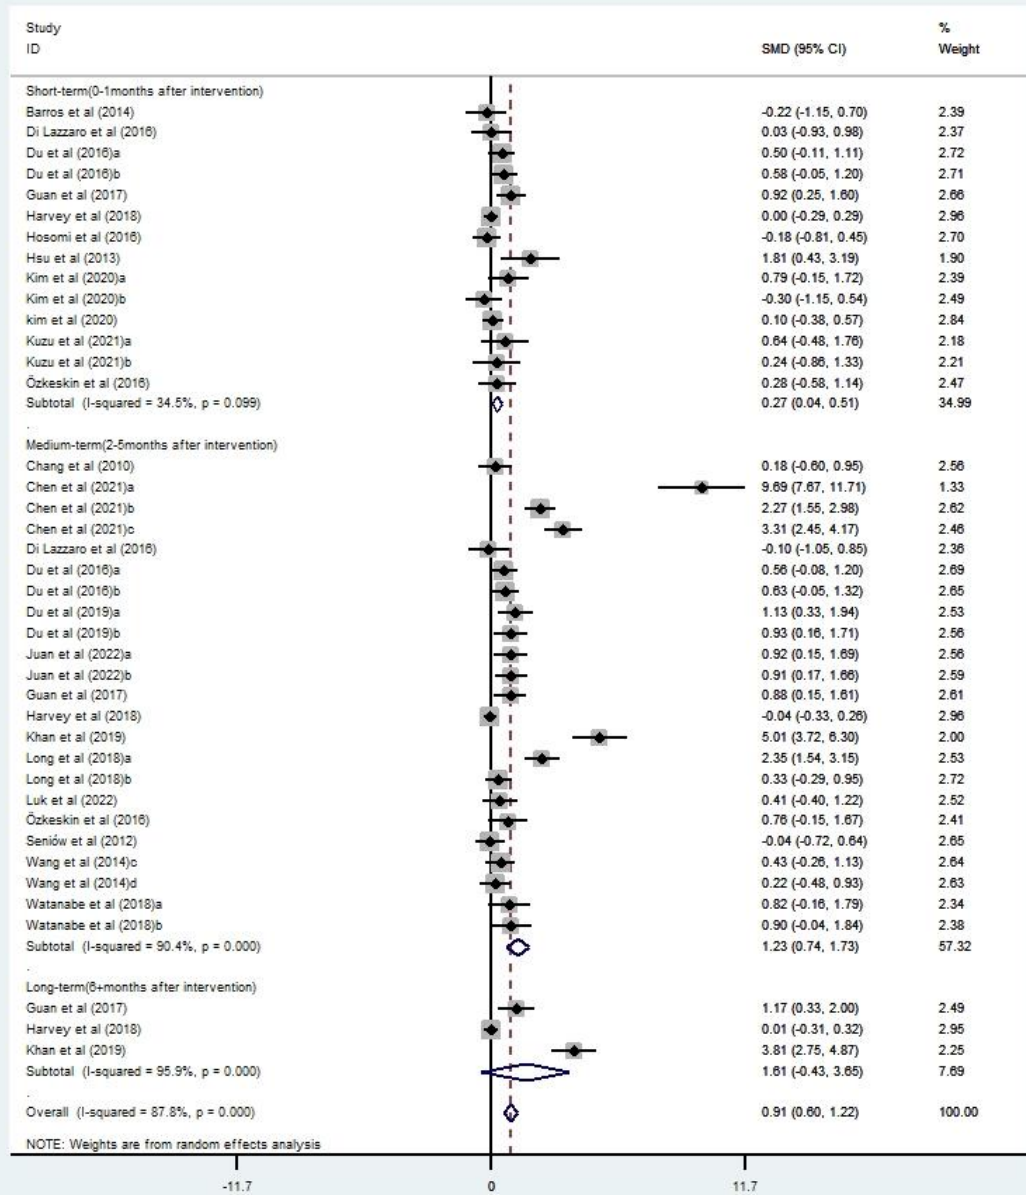

Supplementary Fig.5 Forest plot of FMA-UE in stroke patients disaggregated by time of assessment compared with controls.

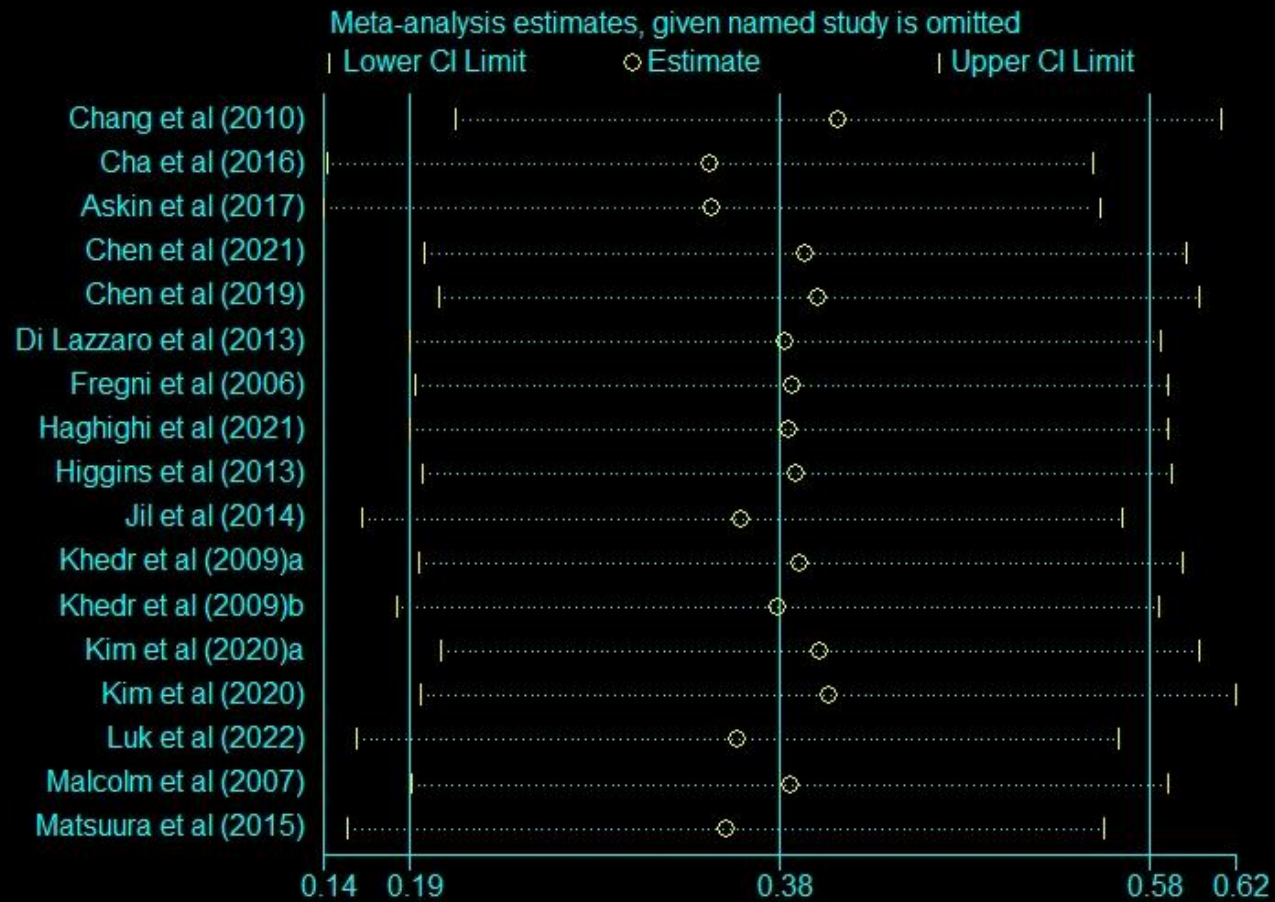

Supplementary Fig.6 Results of sensitivity analysis showing the stability of the results in the included studies
